# Supplementary material
Source: PubMed Central journal article supplement (PMC5505507)
Supplement: NIHMS875202-supplement-Suppl.pdf [file NIHMS875202-supplement-Suppl.pdf]

## Supporting Information

### Screening of Natural Compounds as Activators of the Keap1-Nrf2 Pathway

Kai C Wu<sup>1</sup>, Peter R McDonald<sup>2</sup>, Jie Liu<sup>3</sup>, Curtis D Klaassen<sup>3</sup>

#### Affiliation

<sup>1</sup>Department of Pharmacology, Toxicology, and Therapeutics, University of Kansas Medical Center, Kansas City, KS, USA

<sup>2</sup>High-Throughput Screening Core Facility, Structural Biology Center, University of Kansas, Lawrence, KS, USA

<sup>3</sup>Department of Internal Medicine, University of Kansas Medical Center, Kansas City, KS, USA

#### Correspondence

***Curtis D. Klaassen, PhD***

Department of Internal Medicine

University of Kansas Medical Center

3901 Rainbow Boulevard

Kansas City, KS 66160

USA

Phone: +1 913 588 7714

cklaasse@kumc.edu
